# Supplementary material
Source: PubMed Central journal article supplement (PMC2556431)
Supplement: mmc1.pdf [file mmc1.pdf]

**Supplemental Data****FASTKD2 Nonsense Mutation in an Infantile****Mitochondrial Encephalomyopathy****Associated with Cytochrome C Oxidase Deficiency**

**Daniele Ghezzi, Ann Saada, Pio D'Adamo, Erika Fernandez-Vizarra, Paolo Gasparini, Valeria Tiranti, Orly Elpeleg, and Massimo Zeviani**

**Table S1.** Respiratory chain activities of muscle homogenate and fibroblasts of Patient II-1 normalized to the activity of citrate synthase (CS).

| <b>Patient II-1 muscle*</b>           | <b>enzyme/CS</b> | <b>Control mean (<math>\pm</math>SD)</b> | <b>%</b> |
|---------------------------------------|------------------|------------------------------------------|----------|
| Succinate-ubiquinone reductase        | 8.4              | 21.5 $\pm$ 6.5                           | 39       |
| Succinate dehydrogenase               | 9.7              | 14 $\pm$ 3.3                             | 69       |
| NADH-ubiquinone reductase             | n.d.             | 18.5 $\pm$ 5.5                           | -        |
| DBH <sub>2</sub> cytochrome reductase | 42               | 127.5 $\pm$ 39.5                         | 33       |
| Cytochrome c oxidase                  | 23               | 170 $\pm$ 50                             | 14       |
| Mg ATPase                             | 273              | 155 $\pm$ 66                             | 176      |
| <b>Patient II-1 fibroblasts**</b>     |                  |                                          |          |
| Succinate-ubiquinone reductase        | 14.2             | 13.5 $\pm$ 4.9                           | 105      |
| Succinate dehydrogenase               | 9.3              | 10.4 $\pm$ 3.9                           | 89       |
| NADH-ubiquinone reductase             | 26.4             | 18.4 $\pm$ 7.7                           | 143      |
| DBH <sub>2</sub> cytochrome reductase | 105              | 108.3 $\pm$ 21.8                         | 97       |
| Cytochrome c oxidase                  | 129              | 124.6 $\pm$ 37,6                         | 104      |
| Mg ATPase                             | 102              | 89.2 $\pm$ 23.5                          | 112      |

\*Citrate synthase (CS) specific activity in muscle: 100 nmol/min/mg (normal control 145 $\pm$ 65)

\*\*CS specific activity in fibroblasts: 156 nmol/min/mg (normal control 150 $\pm$ 50)

n.d.= not determined

**Table S2.** List of the genes in the disease locus analyzed by sequencing

| <b>Symbol</b> | <b>HUGO nomenclature</b>                         | <b>Protein accession number</b> |
|---------------|--------------------------------------------------|---------------------------------|
| MT-ABC3       | Mitochondrial ATP-binding Cassette 3             | NP_005680                       |
| MARS          | Mitochondrial methionyl-tRNA synthetase 2        | NP_004981                       |
| MRPL44        | Mitochondrial ribosomal protein L44              | NP_075066                       |
| MTX2          | Metaxin 2                                        | NP_001006636                    |
| HSPD1         | Heat shock 60kDa protein 1 (chaperonin)          | NP_955472                       |
| HSPE1         | Heat shock 10kDa protein 1 (chaperonin 10)       | NP_002148                       |
| BCS1L         | BCS1-like (yeast)                                | NP_004319                       |
| GLS           | Glutaminase                                      | NP_055720                       |
| NIF3L1        | NIF3 NGG1 interacting factor 3-like 1 (S. pombe) | NP_068596                       |
| ADAM23        | ADAM metallopeptidase domain 23                  | NP_003803                       |
| PNKD          | Paroxysmal nonkinesigenic dyskinesia             | NP_056303                       |
| OSGEPL1       | O-sialoglycoprotein endopeptidase-like 1         | NP_071748                       |
| C2orf47       | Chromosome 2 open reading frame 47               | NP_078796                       |
| COQ10B        | Coenzyme Q10 ortholog B (S. cerevisiae)          | NP_079423                       |
| FASTKD2       | FAST kinase domain 2                             | NP_055744                       |

Supplemental Figure 1

Chromosome 2

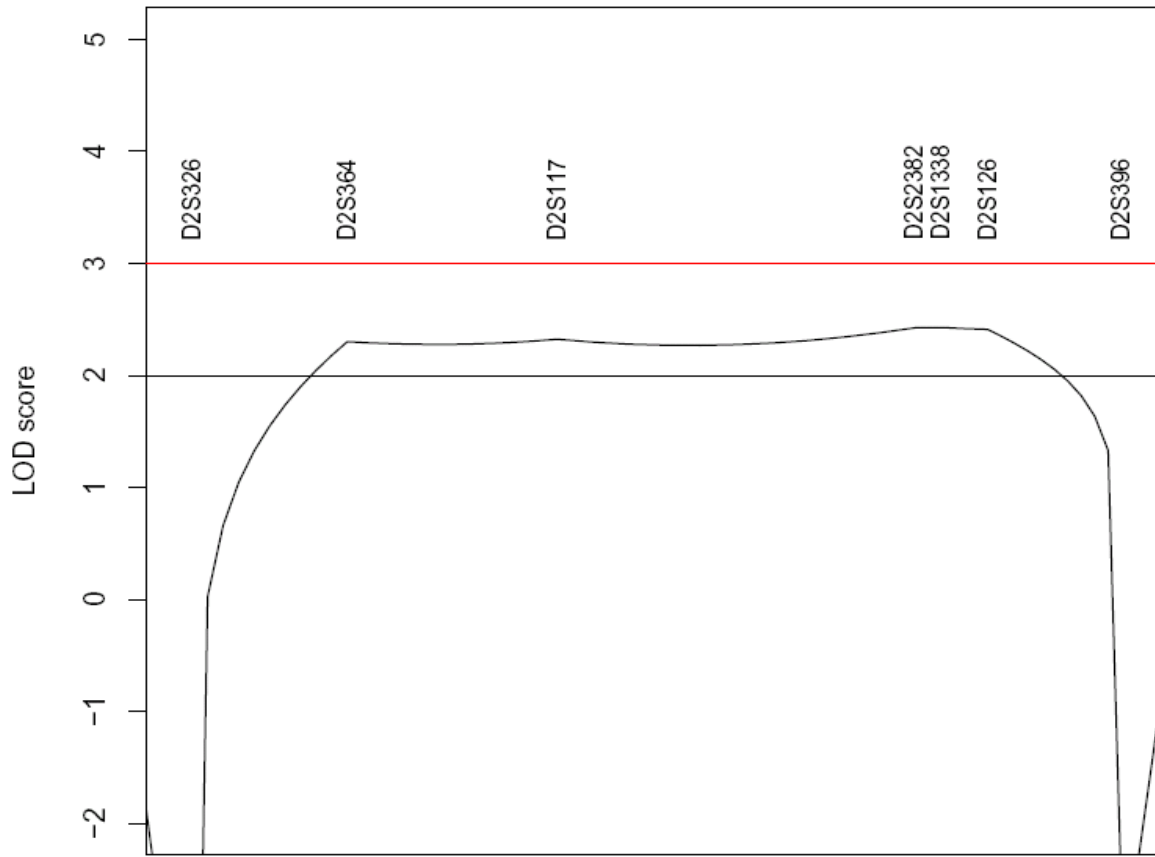

Supplemental Figure 2

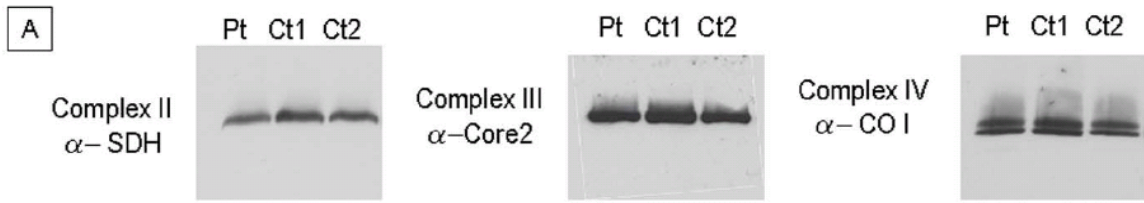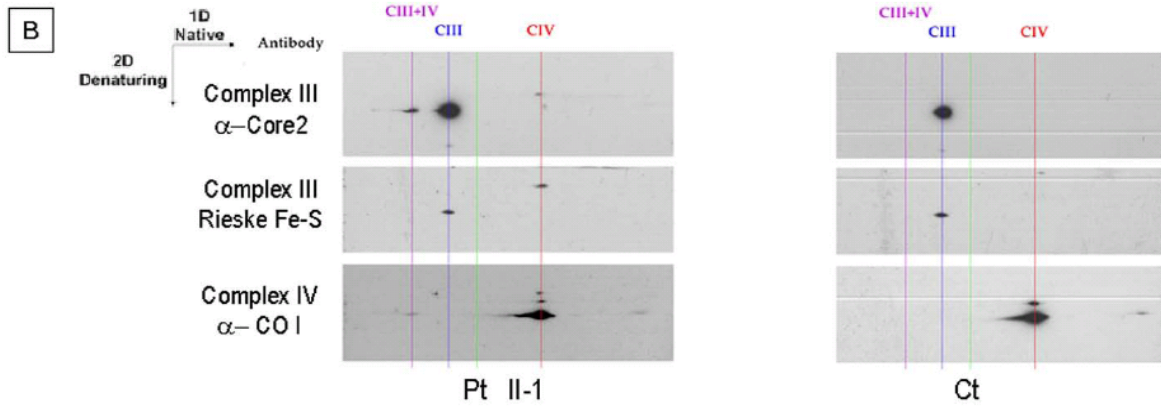

Supplemental Figure 3

**A.**

|        |                                                                           |     |
|--------|---------------------------------------------------------------------------|-----|
| Homo   | MNNKAGSFFWNLRFQSTLVSTSRMTMLCCLGLCKPKIVHSNWN----ILNNFHNRMQSTD              | 56  |
| Pongo  | MNNKAGSFFWNLRFQSTLVPTSRIMRLYRLGLCKPKIVHSNWN----ILNNFHNMRSTD               | 56  |
| Bos    | MTNRAGSFLWNLRLQSTLVPTGRVRLYLPLAFCRPNLAYSNWNRN-LLNLTFGNKMHS-               | 58  |
| Mus    | MNSKARSLLTWIRRFSTLLPRSALRIDPLGTCRPEVIHSKWNPRNHLNLFVDEGLQPS-               | 59  |
| Gallus | MGYLLNAVRY-LRRCSVPRPSAPTSRHHVVTGRHRDCLDNTNCRITFLNAPPSLRGSP-               | 58  |
|        | * : . : ** * . : . . : : . : * ** * . . .                                 |     |
| Homo   | IIRYLFQDAFIFKSD-VGFQTKGISTLTALRIERLLYAKRFFDSKQSLVPVDKSDDELK               | 115 |
| Pongo  | IIRYLFQDAFIFKSD-VGFQTKGISTLTARRIERLLYARRLFFDSKQSLVPVDKSDDLGK              | 115 |
| Bos    | -TRYLFQDALIFKSEGDGCQTGINTATVFTVDKLLCPRRSFDKHFVSVN----ELK                  | 113 |
| Mus    | -VRYLFQDIFIKSVDCIQTKGISHSVAVFKPDRLLCPRRSFDKHSFVSDGTSDDLK                  | 118 |
| Gallus | -LRFLSHKADAFVGVDEVQEK-----SREAAVSEQAPQSSLE                                | 95  |
|        | * : * : . . * * * * : : . . * * : : . . * :                               |     |
| Homo   | KVNLNHEVSNEDVLTKETKPNRISSRKLSEECNSLSDVLDAFSKAPTFPSSNYFTAMWTI              | 175 |
| Pongo  | KVNLNHEVSNEDVLTKETKPNRISSRKLSEECNSLSDVLDAFSKAPTFPSSNYFTAMWTI              | 175 |
| Bos    | KS-FHQEASDEDVLTKRKPKALISSTKLSQECNSLSDVLDIFSKAPTFPSSNYFSAMWTI              | 172 |
| Mus    | KINFHHTSS-EDVFTKVRPTPVNYKKLAQECNSLSDVLDTFKAPTFPGSNYFLAMWII                | 177 |
| Gallus | LEKLEGDAQSFVKAALDENEQFFNRLHTCACPSDVLDLASESAVSIKQFTNCLTTIWKL               | 155 |
|        | : . . * : . . : * * * * * * . . : * : : * : :                             |     |
| Homo   | AKRLSDDQKRFKRLMFSHPAFNQLCEHMMREAKIMQYKYLFLSLHAIVKLGIPQNTILV               | 235 |
| Pongo  | AKRLSDDQKRFKRLMFSHPAFNQLCEHMMREAKIMQYKYLFLSLYSVMVKLGIPQNTILV              | 235 |
| Bos    | AKRMSDDQKRFKRLMFSHPAFNQLCEHMMREAKIMYFGDLLFSLHAIVKLGIPQNTLLV               | 232 |
| Mus    | AKRISDDQKRFKRLMFSHPAFNQLCEHMMREAKIMHYDHLFLSLNAIVKLGIPQNTLMV               | 237 |
| Gallus | LRSMDDQRRYKRLVFEHPAFVRLCQQLLRDSRRMTRGDLVFLHAVVNLGVPQNTLLV                 | 215 |
|        | : : * : * : * : * : * : * : * : * : * : * : * : * : * : * : * : * : * :   |     |
| Homo   | QTLRVTQERINECDEICLSVLSTVLEAMEPCKNVHVLRTGFRILVDQQVWKIEDVFTLQ               | 295 |
| Pongo  | QTLRVTQERINECDEICLSVLSTVLEAMEPCKNVHVLQMGFRILVDQQVWKIEDVFTLQ               | 295 |
| Bos    | QTLRVTQERINECDEICLSVLSTVLEAMEPCKNVHVLQMGFRILVDQQVWKIEDVFTLQ               | 292 |
| Mus    | QTLRVTQERINECDEICLSVLSTVLEAMEPCKNVHVLQMGFRILVDQQVWKIEDVFTLQ               | 297 |
| Gallus | QTLRVCQEKLNQLDNRCMSVLAATLAGMDEKNSALQAGLQLLVEQRLPSIRDFILQ                  | 275 |
|        | ***** * : : * : * : * : * : * : * : * : * : * : * : * : * : * : * :       |     |
| Homo   | VVMKCIGKDAPIALKRKLEMKALRELDRFVLSNSQHMFEVLAAMNHRSLILLDECSKVVL              | 355 |
| Pongo  | VVMKCIGKDAPIALKRKLEMKALRELDRFVLSNSQHMFEVLAAMNHRSLILLDECSKVVL              | 355 |
| Bos    | TVMRSIGKDAPIALKRKLEMKALRELDRFVLSNSQHMFEVLAAMNHRSLILLDECSKVVL              | 352 |
| Mus    | TVMKCIGKDAPIALKRKLEMKALRELDRFVLSNSQHMFEVLAAMNHRSLILLDECSKVVL              | 357 |
| Gallus | NLMKCMGKDAPVFLKLLKEMAVLREIDHLYPNAHRVFLGLVAMNYCSPVPLNACSKKIQ               | 335 |
|        | : * : . : ***** * : * : * : * : * : * : * : * : * : * : * : * : * :       |     |
| Homo   | DNIHGCPRLRIMINILQSCKDLQYHNLDFKGLADYVAATFDIWKFRKVLFIILILFENLGF             | 415 |
| Pongo  | DNIHGCPRLRIMINILQSCKDLQYHNLDFKGLADYVAATFDIWKFRKVLFIILILFENLGF             | 415 |
| Bos    | SNIHGCPKILINILQSCRDLYQYHNLDFKGLADYVAATFDIWKFRKVLFIILILFENLGF              | 412 |
| Mus    | DNVHGCPKVLISILQSCRDLYQYHNLDFKGLADYVAATFDIWKFRKVLFIILILFENLGF              | 417 |
| Gallus | ENIHDPYWLILILEACHSLQYRNKLFSAVADYVNSIVCLLDKRIILFLSAFETLGF                  | 395 |
|        | . * : . . * : * : * : * : * : * : * : * : * : * : * : * : * : * : * : * : |     |
| Homo   | RPVGLMDLFMKRIVEDPELSNMKNILSLHTYSSLNHVYKQNKQFVEVMASALTGYLH                 | 475 |
| Pongo  | RPVGLMDLFMKRIVEDPELSNMKNILSLHTYSSLNHVYKQNKQFVEVMASALTGYLH                 | 475 |
| Bos    | RPVGLMDLFIKKADEPGFLNVKSLVGLNHYSSLNHVYKQNKQFVEVMASALTGYLH                  | 471 |
| Mus    | RPPGLMDKLMKVVQEPGSLNVKNIVSILHVSSSLNHVHKIHN-REFLEALASALTGYLH               | 476 |
| Gallus | QPSELMGVLAEKVTEDEFLDLKSLFLIVLRVYSRLNYPVPGQH-LLFYETLHSCLNKYLP              | 454 |
|        | : * * * . : : . : . * : * : * : * : * : * : * : * : * : * : * : * :       |     |
| Homo   | TISSENLLDAVYSFCLMNYFPLAPFNQLLQKDIISELLTSDDMK--NAYKLHTLDTCLKL              | 533 |
| Pongo  | TISSENLLHAVYSFCLMNYFPLAPFNQLLQKDVISELLTSDDMK--NVYKLHMLDTCLKL              | 533 |
| Bos    | HISSENLLNAVCSFCWMNCFPLALINQLLQKDIIDLLTSGDVER-NVHRLHVATCLKL                | 530 |
| Mus    | HISSESLNNAVHVSFCMNYFPLAPINQLIKENIINELLTSGDTEK-NIHKLHVNTCLKL               | 535 |
| Gallus | QISNAELLKAVYSLCILGYLPHLALNQLLKKDSFEELMSGDLYKEKREMMHLCVRCMEL               | 514 |
|        | * * . * * * * * * * * : * : * : * : * : * : * : * : * : * : * : * :       |     |
| Homo   | DDTVYLRDIALSLPQLPRELPPSHNAKVAEVLSSLLGGEGHFSKDVHLPNHYHIDFEIR               | 593 |
| Pongo  | DDTVYLRDIALSLPQLPRELPPSHNAKVAEVLSTDRS-PHNFPKAVAAATNSTHYIFEIR              | 592 |
| Bos    | DDAPCHKDLVLVLPQLPMTFCQPQ--KVAAVLSDLLG-EGCFSSQSVQLPHNYHIDFEIR              | 587 |
| Mus    | DESTY-KSVHIPLPQLP--LSASQPNKLAEVLSSLLGGEGHFSRNVPLPHNYHIDFEIR               | 592 |

Gallus DSPSFMKPAFVPTEIFSSLSVVTLR--KAREALLELLGDENMFRQNVQLPYRIDFEIW 572  
\* . . . : : : . . . \* . . . \* : \* . . . \* \*\*

Homo MDTNRNQVLPLSDVDTTSATDIQRVAVLCVSRSAYCLGSSHPRGFLAMKMRHLNAMGFHV 653  
Pongo MDTNRNQVLPLSDVDTTSATDIQRVAVLCVSRSAYCLGSSHPRGFLAMKMRHLNAMGFHV 652  
Bos MDANRSQVLPFSDVDVVTSTDIQRVAVLCVPKSAYCLDSTHPKGYLAMKMRHLKIMGFHV 647  
Mus MDTNRTQVFSFSDVDASSATNMQRVAVLCVPKSVYCLNSCHPRGLMAMKIRHLNMMGFHV 652  
Gallus MDSDTKKVLPITATDSYADRSVQRLAFLVPPSAFCLGTTHPQGKLAMKKRHLSKLGYHV 632  
\*\*\*: . :\*: :\*: : \* : . :\*:\*: \* . \* :\*: :\*: \* :\*\*\* \*\* . :\*\*:

Homo ILVNNWEMDKLEMEDAVTFLKTKIYSVEALPVAAVNVQSTQ 694  
Pongo ILVNNWEMDKLEMEDAVTFLKTKIYSVEALPVAAVNVQST- 692  
Bos ILVNNWEVEKLEMKDAVFLKTKIYSPKALSSADIHLQSTC 688  
Mus ILIHNWELKLMEDAVTFVRKKIYSDEVLPTADTTV---- 689  
Gallus IPVLNKKFQELTNEGAIEFLKGKIYSENVSPFSEVNLCDNN 673  
\* : \* : . . : \* : . \* : \* : \* \* \* : . . : :

**B.**

Homo MLTTLKPFGSVSVESKMNNKAGSFFWNLRQFSTLVSTSRTMRLCCLGLCKPKIVHSSNWN- 43  
Pan ILTTLKPFGSVSVESKMNNKAGSFFWNLRQFSTLVSTSRTMRLCCLGLCKPKIVHSSNWN- 43  
Pongo ILTTLKPFGSVSVESKMNNKAGSFFWNLRQFSTLVPTSRTMRLYRLGLCKPKIVHSSNWN- 43  
Bos LXGIRKISRVAQFAGMTNRAGSFLWNLRLSTLVPTGRTVRLYPLAFCRPNIAYSSNWN 44  
Mus LTYKRIRNTSPDAPLEMNSKARSLLWTIRRFSTLLPRSRALRIDPLGTCRPEVIHSKWNP 44  
Gallus YVLSPGLFPMVGFPQIMGYLLNAVRY-LRRCSPVPRSPAPTSRHVVWTGRHRDCLDNTNC 43  
\* : \* : . . : \* : . \* : \* : \* \* \* : . . : :

## Supplemental data

### Figure S1. Multipoint linkage analysis

The graph represents the region between markers D2S326 and D2S396 with a location score  $\geq 2$ . A pairwise lodmax score of 2.428 was on D2S1338.

### Figure S2. BNGE of patient and control muscle

*Panel A.* One-dimension BNGE of muscle homogenates from patient II-1 (Pt) and 2 controls (Ct1 and Ct2). An antibody against the SDH 30 kDa subunit was used to detect complex II; an antibody against Core2 was used for complex III; and an antibody against COX-I was used for complex IV.

*Panel B.* Second-dimension BNGE of patient II-1 (Pt) and control (Ct) muscle homogenates. Antibodies against Core2 and Rieske Fe-S protein were used to detect complex III; an antibody against COX-I was used for complex IV.

### Figure S3. Comparative Protein Sequence analysis of FASTKD2

*Panel A.* Interspecies alignment of full-length FASTKD2 protein sequences, obtained by ClustalW software online.

Accession numbers: *Pongo pygmaeus*: ENSPPYG00000013112; *Bos Taurus*: NP\_001095587; *Mus musculus*: NP\_766010; *Gallus gallus*: XP\_421951; *Pan troglodytes*: ENSPTRG00000012848.

*Panel B.* Predicted sequences corresponding to the translatable ORF of human FASTKD2 protein sequence from the first predicted methionine (M1) to the second methionine (M17). The M1 is consistently absent in non-human species, suggesting that the M1-M17 sequence is not translated and therefore that in humans as in other species the FASTKD2 protein starts from the second potential ATG initiation codon (M17).
